# Supplementary material for: Cardiomyocyte-fibroblast interaction regulates ferroptosis and fibrosis after myocardial injury
Source: PubMed Central journal article supplement — bioRxiv. 2023 Feb 8:2023.02.07.527364. Preprint. [Version 1] doi: 10.1101/2023.02.07.527364 (PMC9934560; doi:10.1101/2023.02.07.527364), 2023-02-08
Supplement: media-1.pdf [file media-1.pdf]

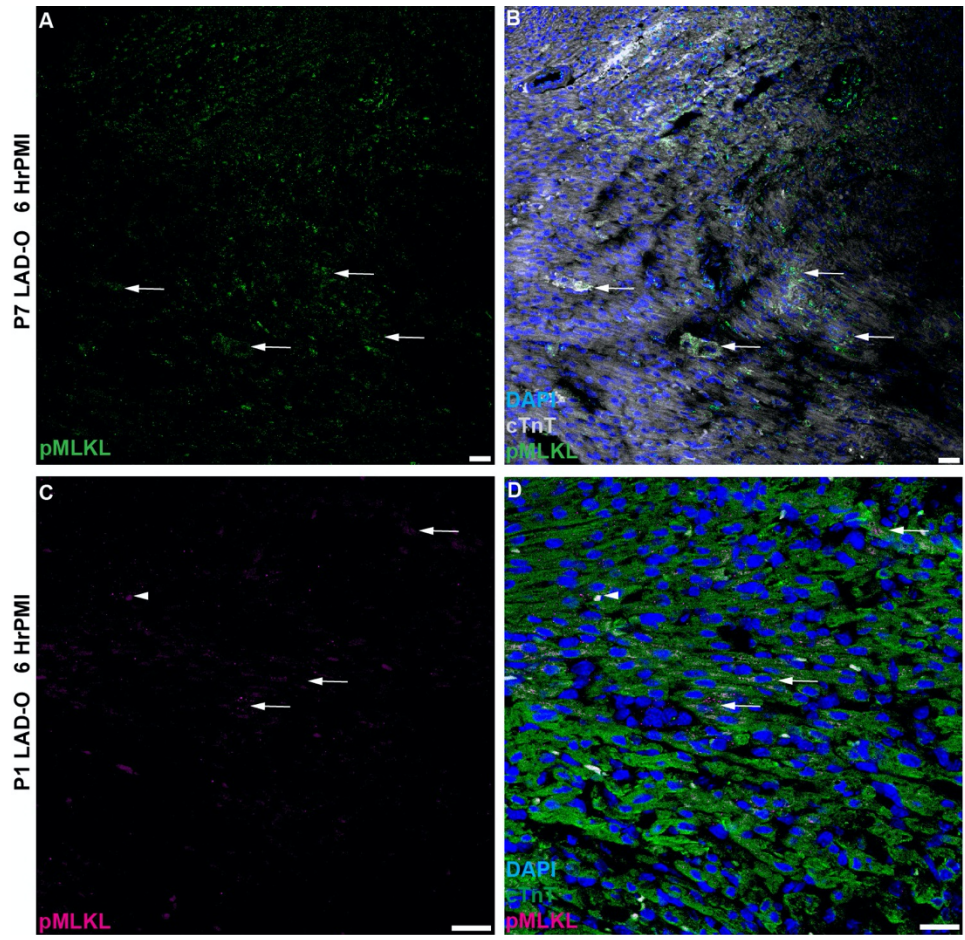

**Figure S1. Necroptosis in cardiomyocytes immediately after MI, related to Figure 1.** (A, B) Heart tissue section of wild type mouse stained for pMLKL (Green) and cTnT (grey) at 6 hours after P7 LAD-O. (C, D) Heart tissue section of wild type mouse stained for pMLKL (magenta) and cTnT (green) at 6 hours after P1 LAD-O. DAPI in blue. Arrows, cardiomyocytes positive for pMLKL. Scale bar, 25  $\mu$ m.

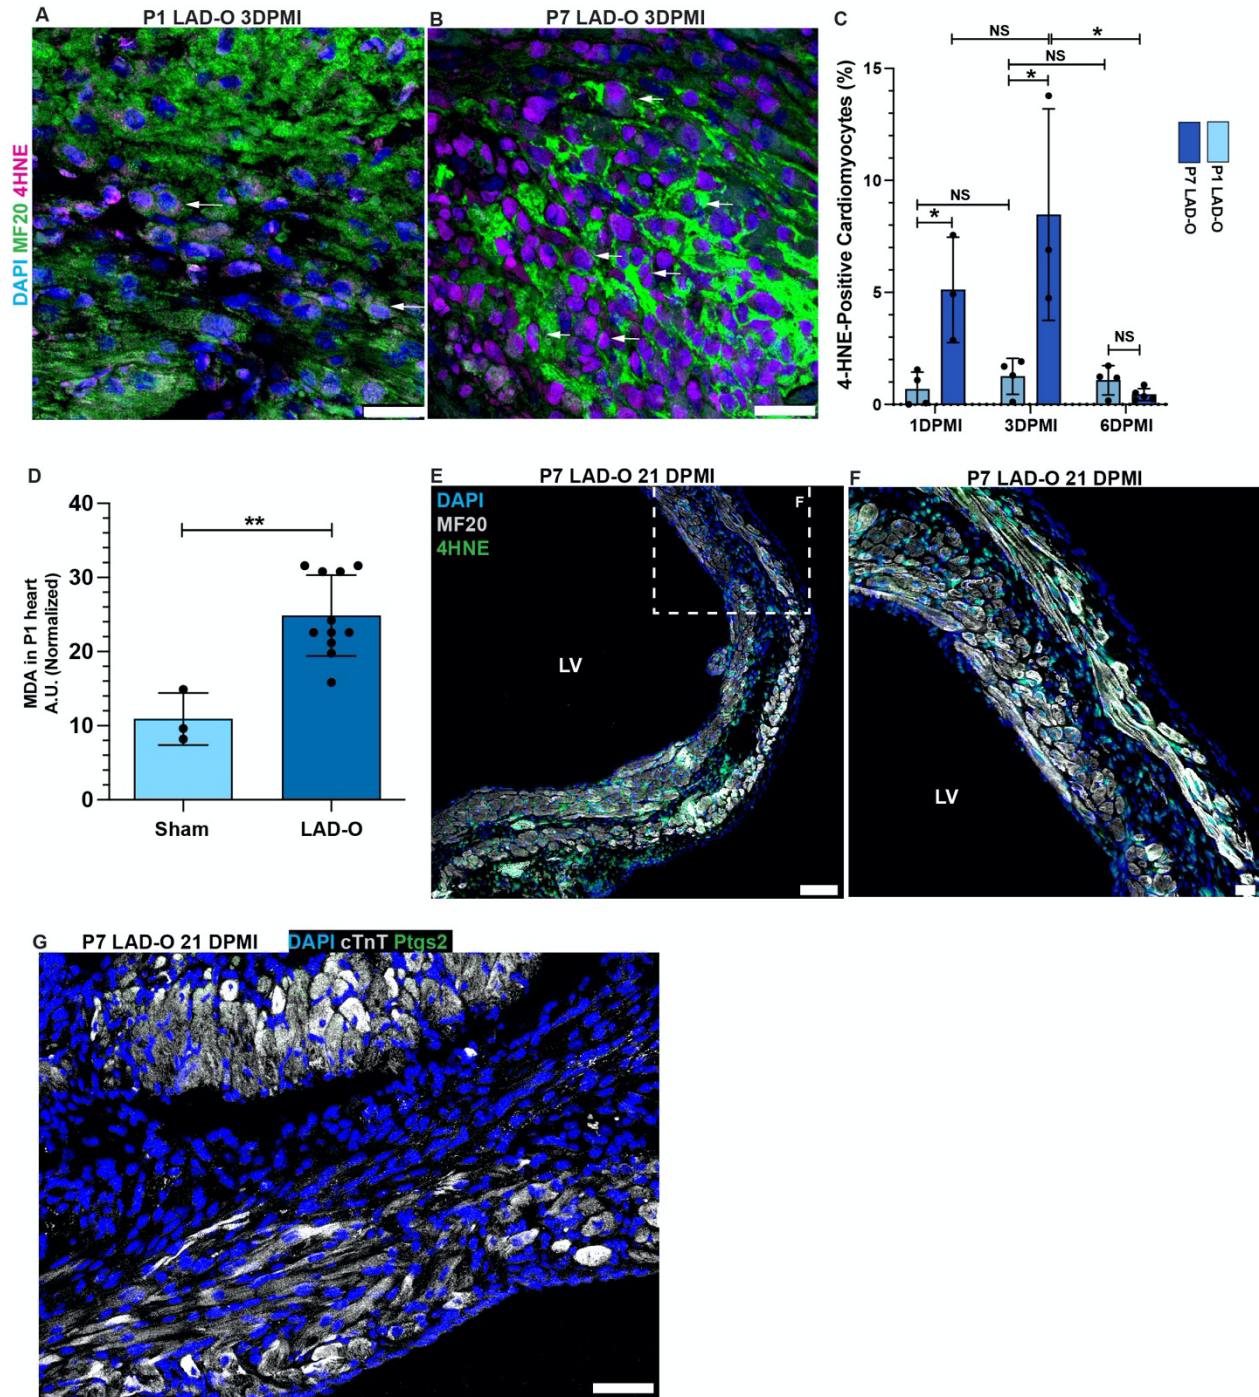

**Figure S2. Ferroptosis occurs in cardiomyocytes after MI, related to Figure 1.** (A, B) Mouse heart tissue stained for 4-HNE (magenta) and MF20 (green) at 3 days after P1 (A) or P7 (B) LAD-O. Arrows, cardiomyocytes positive for 4-HNE. (C) Ratio of cardiomyocytes positive for 4-HNE at 1, 3 and 6 days after P1 or P7 LAD-O. (D) MDA assay quantified lipid peroxidation level in ventricular myocardium after P1 LAD-O or sham procedure. (E, F) Mouse heart tissue stained for 4-HNE (green) and MF20 (grey) at 21 days after P7 LAD-O. (G) Heart tissue stained for Ptgs2 (green) and MF20 (grey) at 21 days after P7 LAD-O. LV, left ventricle. DAPI in blue. Error bars indicate SD. \*,  $p < 0.05$ . \*\*,  $p < 0.01$ . NS, not significant. Scale bar, 25  $\mu\text{m}$  (A, B, F, G), 100  $\mu\text{m}$  (E).



**A**

|                | Cell number/well  |                   |                   | Medium volume/well |
|----------------|-------------------|-------------------|-------------------|--------------------|
|                | HCF               | iCM               | HEK293            |                    |
| Low density    | 3X10 <sup>3</sup> | 3X10 <sup>3</sup> | 3X10 <sup>3</sup> | 200 $\mu$ l        |
| Middle density | 3X10 <sup>4</sup> | 2X10 <sup>4</sup> | 3X10 <sup>4</sup> | 500 $\mu$ l        |
| High density   | 10 <sup>5</sup>   | 6X10 <sup>4</sup> | 10 <sup>5</sup>   | 1000 $\mu$ l       |

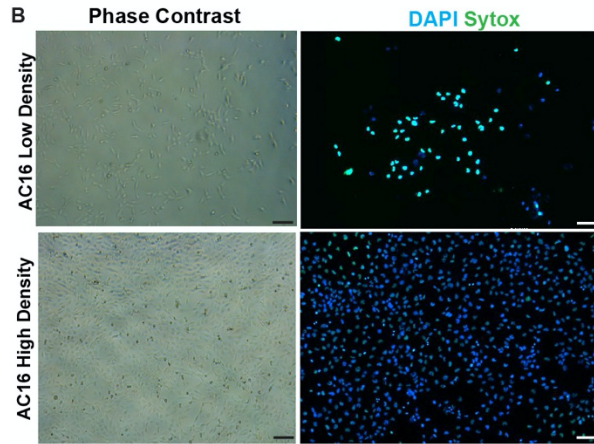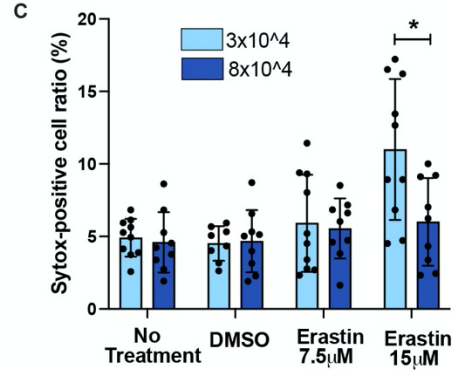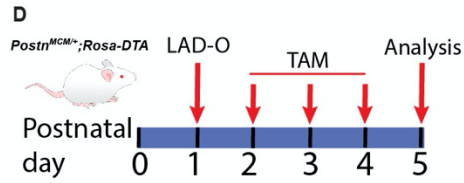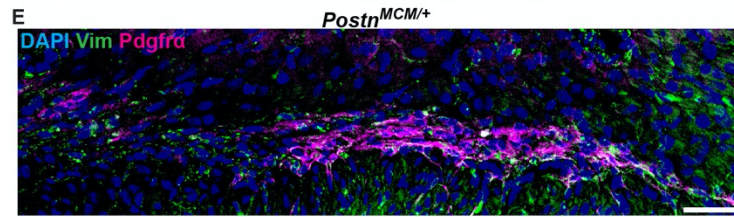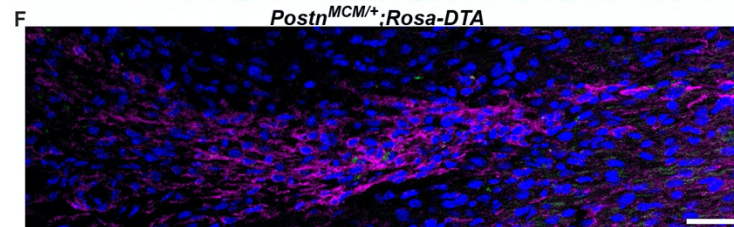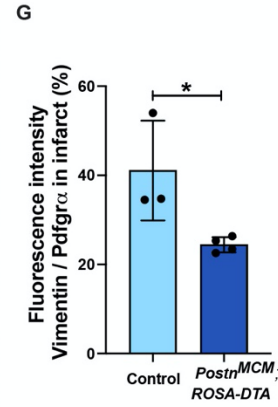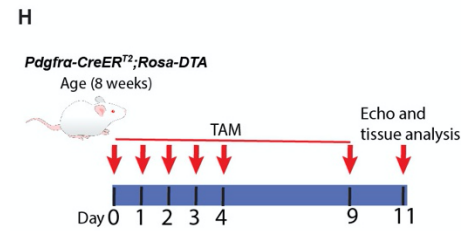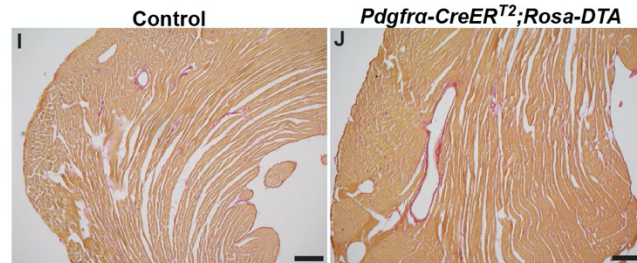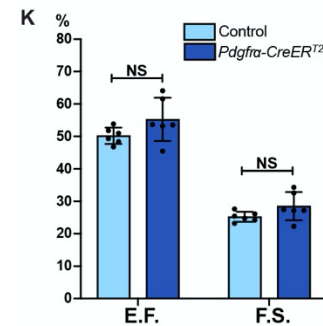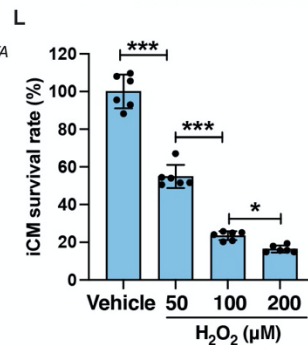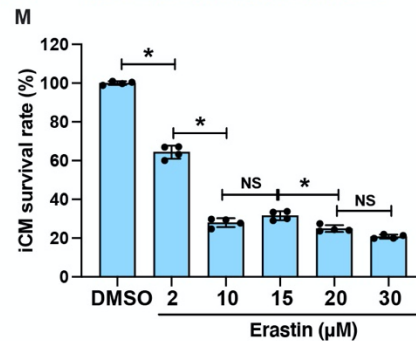

**Figure S3. Cell density regulates ferroptosis *in vitro* and *in vivo*, related to Figure 2 and Figure 3.**

(A) Schematic of cell density assays, see Figure 2 and 3. (B) AC16 cells cultured at low ( $3 \times 10^4$ /well) and high ( $8 \times 10^4$ /well) density and treated with erastin. Dying cells were stained with Sytox (green). (C) Ratio of Sytox-positive AC16 cells. (D) Schematic plan for E-G and Figure 2H-P. (E, F) Heart tissue of controls (*Postn*<sup>MCM/+</sup>, E) and *Postn*<sup>MCM/+</sup>;*ROSA-DTA* (F) mice were stained for Vim (green) and *Pdgfr* $\alpha$  (magenta) at 4 DPMI after P1 LAD-O. (G) Ratio of fluorescence intensity, Vim over *Pdgfr* $\alpha$ . (H) Schematic plan for I-K and Figure 2R-W. (I, J) Picrosirius red staining of adult control (*Rosa-DTA*, I) and *Pdgfr* $\alpha$ -*CreER*<sup>T2</sup>;*ROSA-DTA* (J) mice. (K) Ejection fraction (E.F.) and fractional shorting (F.S.) of control and *Pdgfr* $\alpha$ -*CreER*<sup>T2</sup>;*ROSA-DTA* mice. (L) Survival rate of iCM after treatment with 50, 100 or 200  $\mu$ M of H<sub>2</sub>O<sub>2</sub>, compared to vehicle (H<sub>2</sub>O). (M) Survival rate of iCMs after erastin treatment at 2, 10, 15, 20 or 30  $\mu$ M, compared to DMSO control. Nuclei stained with DAPI (blue). TAM, tamoxifen. Error bars indicate SD. \*,  $p < 0.05$ . \*\*\*,  $p < 0.001$ . NS, not significant. Scale bar, 100  $\mu$ m (B, I, J), 25  $\mu$ m (E, F).



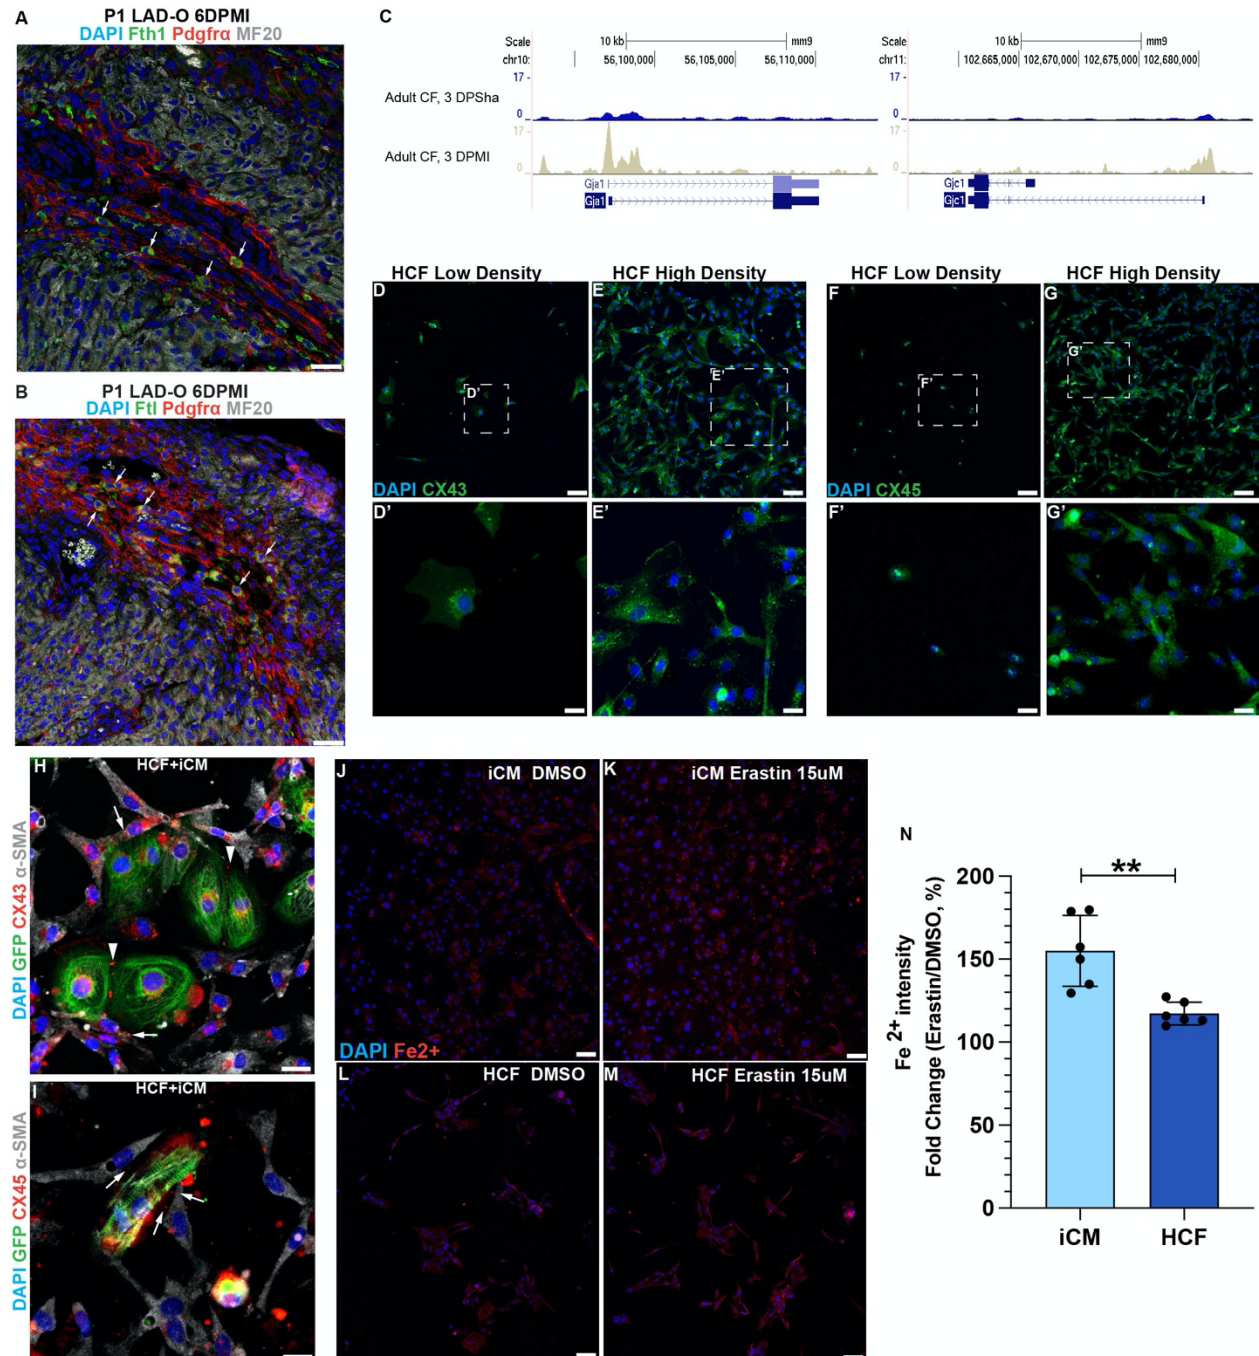

**Figure S4. Cardiac fibroblasts interact with cardiomyocytes to share free iron, related to Figure 5.** (A, B) Mouse heart sections stained for Fth1 (green, A) or Ftl (green, B), with Pdgfra (red) and MF20 (grey) at 6 days after P1 LAD-O. Arrows, Pdgfra-labeled cells positive for Fth1 (A) or Ftl (B). (C) ATAC-Seq shows open chromatin region at loci of *Gja1* (*Cx43*) and *Gjc1* (*Cx45*) in adult cardiac fibroblasts at 3 days after LAD-O or sham procedure. (D-G') HCF cultured in low or high density and stained for CX43 (green, D-E') and CX45 (green, F-G'). (H-I) Co-cultured iCMs (marked by TITIN-GFP, green) and HCFs stained for CX43 (red, H) or CX45 (red, I), with  $\alpha$ SMA (grey). Arrowheads in H, gap junctions between iCMs. Arrows in H and I, gap junctions between iCM and HCF. (J-N) iCMs (J, K) and HCF (L, M) stained for Fe<sup>2+</sup> (red) after DMSO (J, L) or erastin (K, M) treatment. Fold change of Fe<sup>2+</sup> fluorescent intensity after erastin treatment in

iCM and HCF quantified in N. Nuclei stained with DAPI (blue). Error bars indicate SD. \*\*,  $p < 0.01$ . Scale bar, 25  $\mu\text{m}$  (A, B, D', E', F', G', H, I), 100  $\mu\text{m}$  (D, E, F, G, J-M).

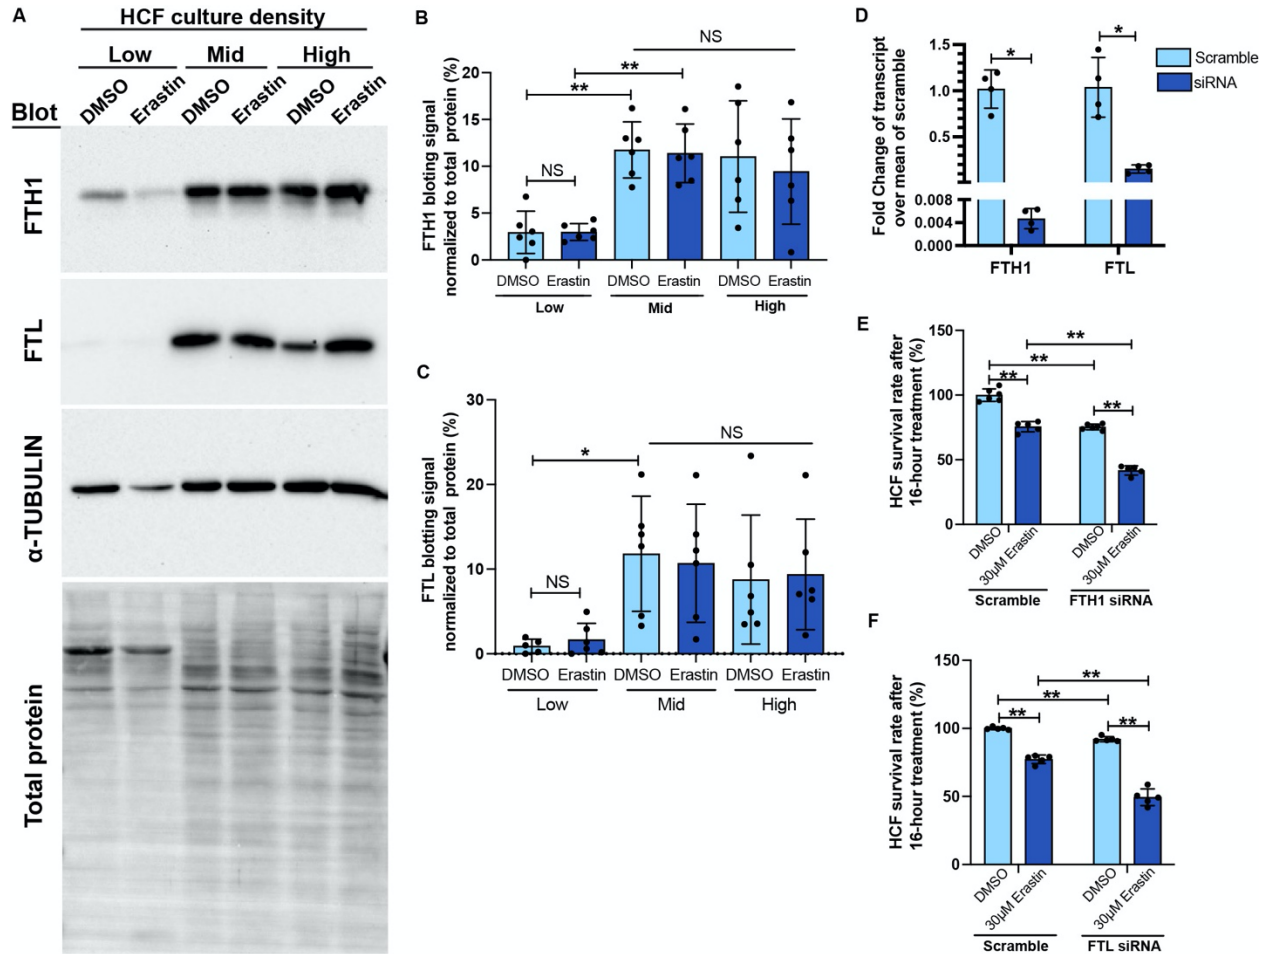

**Figure S5. Cardiac fibroblasts increase Ferritin expression to resist ferroptosis, related to Figure 5.** (A-C) Western blot of FTH1, FTL and  $\alpha$ -TUBULIN in HCFs cultured at low, mid and high density, with DMSO or erastin treatment. Target band signal intensity quantified in B (FTH1) and C (FTL). (D) qPCR shows the knockdown of *FTH1* and *FTL* with siRNA in HCFs. (E, F) Survival rate of HCFs after erastin (30  $\mu\text{M}$ ) treatment, with *FTH1* (E) or *FTL* (F) knockdown compared to scramble siRNA. Error bars indicate SD. \*,  $p < 0.05$ . \*\*,  $p < 0.01$ . NS, not significant.

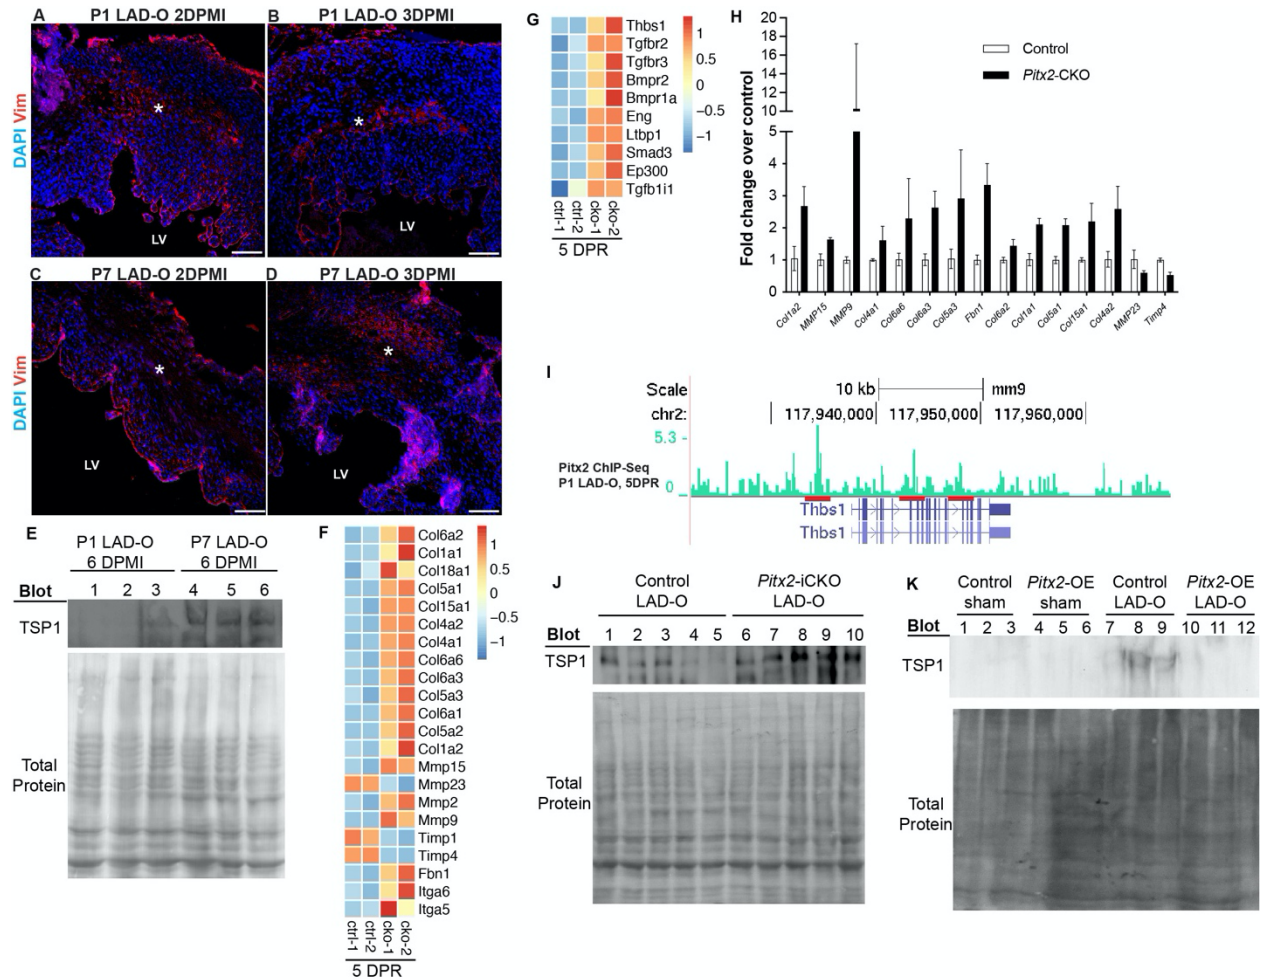

**Figure S6. *Pitx2* regulates fibrotic gene expression in injured myocardium, related to Figure 6.** (A-D) Mouse heart tissue stained for Vim (red) at 2 or 3 days after P1 (A, B) or P7 (C, D) LAD-O. Asterisk, infarct zone. (E) Western blot of *Tsp1* in cardiac ventricles at 6 days after P1 or P7 LAD-O. (F, G) Heatmap of fibrosis-relevant genes in control (*Pitx2<sup>fl/fl</sup>*) and *Pitx2*-CKO (*MCK<sup>cre</sup>;Pitx2<sup>fl/fl</sup>*) ventricles at 5 days after P1 apex resection. (H) qPCR validation of genes in F and G,  $p < 0.05$  for all targets. (I) ChIP-Seq shows *Pitx2*-binding region (red bars) at *Thbs1* locus in regenerative neonatal ventricles. (J) Western blot of *Tsp1* in control and *Pitx2*-iCKO ventricles at 3 days after P1 LAD-O. (K) Western blot of *Tsp1* in control and *Pitx2*-OE ventricles at 3 days after P7 LAD-O. LV, left ventricle. Nuclei stained with DAPI (blue). Error bars indicate SD. Scale bar, 75  $\mu$ m (A-D).
